# Supplementary material for: Psicoanálisis y pedagogía terapéutica
Source: Royal Society of Chemistry journal article supplement (doi:10.1039/c7dt02679j), 2001-01-01
Supplement: c7dt02679j1.pdf [file c7dt02679j1.pdf]

## Electronic Supplementary Information (ESI†)

### **[Cd(H<sub>2</sub>O)<sub>6</sub>]@{Cd<sub>6</sub>Cl<sub>4</sub>(nico)<sub>12</sub>[Hg(Tab)<sub>2</sub>(μ-Cl)]<sub>2</sub>}: a heterometallic host-guest icosidodecahedron cage *via* hierarchical assembly**

Xiao-Yan Tang,<sup>ab</sup> Hong Yu,<sup>a\*</sup> Bin-Bin Gao<sup>a</sup> and Jian-Ping Lang<sup>a\*</sup>

<sup>a</sup> College of Chemistry, Chemical Engineering and Materials Science, Soochow University, Suzhou 215123, China

<sup>b</sup> Department of Chemistry and Materials Engineering, Jiangsu Key Laboratory of Advanced Functional Materials, Changshu Institute of Technology, Changshu 215500, Jiangsu, China

## Table of contents

|                                                                                                                                                                                          |    |
|------------------------------------------------------------------------------------------------------------------------------------------------------------------------------------------|----|
| <b>Experimental section</b> .....                                                                                                                                                        | S3 |
| <b>Materials and methods</b> .....                                                                                                                                                       | S3 |
| Preparation of [Hg(Tab) <sub>2</sub> (nico)] <sub>2</sub> (PF <sub>6</sub> ) <sub>2</sub> ( <b>2</b> ).....                                                                              | S3 |
| Preparation of [Cd(H <sub>2</sub> O) <sub>6</sub> ]@{Cd <sub>6</sub> Cl <sub>4</sub> (nico) <sub>12</sub> [Hg(Tab) <sub>2</sub> (μ-Cl)] <sub>2</sub> } ( <b>3</b> ).....                 | S3 |
| Preparation of [Hg(Tab) <sub>2</sub> ][CdCl <sub>4</sub> ] ( <b>4</b> ) .....                                                                                                            | S3 |
| Single crystal X-ray determinations.....                                                                                                                                                 | S3 |
| <b>Table S1</b> Summary of crystallographic data and structure refinement parameters for <b>2</b> ·3MeCN·2MeOH, <b>3</b> ·10DMF·3H <sub>2</sub> O and <b>4</b> ·MeOH.....                | S4 |
| <b>Table S2</b> Selected bond lengths (Å) and angles (°) for <b>2-4</b> .....                                                                                                            | S5 |
| <b>Table S3</b> The hydrogen bonding parameters (Å, °) between the coordinated water in [Cd(H <sub>2</sub> O) <sub>6</sub> ] <sup>2+</sup> and carboxylate oxygen atom in <b>3</b> ..... | S9 |
| <b>References</b> .....                                                                                                                                                                  | S9 |

## Experimental Section

**Materials and methods.**  $[\text{Hg}(\text{Tab})_2](\text{PF}_6)_2$  was prepared according to the literature method.<sup>S1</sup> Other chemicals and reagents were obtained from commercial sources and used as received. All solvents were pre-dried over activated molecular sieves and refluxed over appropriate drying agents under argon. IR spectra were recorded on a Varian 1000 FT-IR spectrometer as KBr disks (4000-400  $\text{cm}^{-1}$ ). Elemental analyses for C, H, and N were performed on a Carlo-Erba CHNO-S microanalyzer.

**Preparation of  $[\text{Hg}(\text{Tab})_2(\text{nico})]_2(\text{PF}_6)_2$  (**2**).**  $\text{Et}_3\text{N}$  was added to a solution of nicotinic acid (0.25 g, 2 mmol) in  $\text{H}_2\text{O}$  (4 mL) until its pH reaches 7.0. The resulting colourless solution was transferred to a solution containing **1** (0.83 g, 1 mmol) in MeCN/MeOH (15 mL, 3:2, v/v) and the colourless mixture briefly stirred for 0.5 h to form a homogeneous solution. Upon filtration, diethyl ether (40 mL) was carefully layered onto the filtrate at ambient temperature for two weeks to give colorless long needle crystals of  $2 \cdot 3\text{MeCN} \cdot 2\text{MeOH}$ . These crystals were collected by filtration, washed by  $\text{Et}_2\text{O}$  and dried *in vacuo*. Yield: 0.63 g (78% based on Hg). Anal. Calcd. for  $2 \cdot 3\text{MeCN} \cdot 2\text{H}_2\text{O}$  ( $\text{C}_{54}\text{H}_{73}\text{N}_9\text{F}_{12}\text{P}_2\text{S}_4\text{Hg}_2\text{O}_6$ ): C 36.77, H 4.17, N 7.15%; found: C 36.12, H 4.34, N 7.51%. IR (KBr,  $\text{cm}^{-1}$ ): 3405 (br), 1615 (s), 1568 (w), 1491 (s), 1375 (s), 1321 (w), 1190 (w), 1127 (m), 1011 (w), 958 (w), 839 (s), 761 (w), 746 (w), 670 (w), 558 (s)  $\text{cm}^{-1}$ .

**Preparation of  $[\text{Cd}(\text{H}_2\text{O})_6]@[\text{Cd}_6\text{Cl}_4(\text{nico})_{12}[\text{Hg}(\text{Tab})_2(\mu\text{-Cl})]_2]$  (**3**).** A solution of  $\text{CdCl}_2 \cdot 2.5\text{H}_2\text{O}$  (0.23 g, 1 mmol) in MeOH (3 mL) and  $\text{H}_2\text{O}$  (1 mL) was added to a solution of **2** (0.92 g, 1 mmol) in DMF (1 mL) and  $\text{CH}_3\text{OH}$  (6 mL) while stirring. The colourless mixture was stirred for 0.5 h to give a homogeneous solution. Upon filtration, diethyl ether (40 mL) was allowed to diffuse into the filtrate at ambient temperature for two weeks to give forming colourless blocks of  $3 \cdot 10\text{DMF} \cdot 3\text{H}_2\text{O}$ . These crystals were collected by filtration, washed by  $\text{Et}_2\text{O}$  and dried *in vacuo*. Yield: 0.29 g (45% based on  $\text{CdCl}_2$ ). Anal. Calcd. for  $3 \cdot 10\text{DMF} \cdot 3\text{H}_2\text{O}$  ( $\text{C}_{138}\text{H}_{188}\text{N}_{26}\text{Hg}_2\text{Cd}_7\text{Cl}_6\text{O}_{43}\text{S}_4$ ): C 37.43, H 4.28, N 8.22%; found: C 37.04, H 4.52, N 8.48%. IR (KBr,  $\text{cm}^{-1}$ ): 3441(br), 1616 (s), 1566 (m), 1487(m), 1406 (s), 1199 (w), 1124 (w), 1093 (w), 1031 (w), 949 (w), 848 (w), 756 (m), 704(w), 621 (w), 552 (w)  $\text{cm}^{-1}$ .

**Preparation of  $[\text{Hg}(\text{Tab})_2][\text{CdCl}_4]$  (**4**).** A solution of  $\text{CdCl}_2 \cdot 2.5\text{H}_2\text{O}$  (0.68 g, 3 mmol) in MeOH (3 mL) and  $\text{H}_2\text{O}$  (1 mL) was added to a solution of **2** (0.92 g, 1 mmol) in DMF (1 mL) and  $\text{CH}_3\text{OH}$  (6 mL) while stirring. The

colourless mixture was stirred for 0.5 h to give a homogeneous solution. Upon filtration, diethyl ether (40 mL) was allowed to diffuse into the filtrate at ambient temperature for two weeks to give forming colourless blocks of **4**·MeOH. The colourless prism crystals were collected by filtration, washed by Et<sub>2</sub>O and dried *in vacuo*. Yield: 0.70 g (85% based on Hg). Anal. Calcd. for **4**·MeOH (C<sub>19</sub>H<sub>30</sub>CdCl<sub>4</sub>HgN<sub>2</sub>OS<sub>2</sub>): C 27.78, H 3.69, N 3.41%; found: C 27.53, H 3.47, N 3.17%. IR (KBr, cm<sup>-1</sup>): 3420 (br), 3085 (w), 3024 (w), 2963 (w), 1585 (w), 1488 (s), 1409 (m), 1262(w), 1127 (m), 1085 (m), 1015 (m), 959 (w), 806 (m), 746 (w), 551 (m) cm<sup>-1</sup>.

**Single crystal X-ray structure determinations.** All measurements were made on a Rigaku Mercury CCD X-ray diffractometer by using graphite-monochromated Mo K $\alpha$  ( $\lambda = 0.71073$  Å). Single crystals of **2**·3MeCN·2MeOH, **3**·10DMF·3H<sub>2</sub>O and **4**·MeOH suitable for single crystal X-ray analysis were obtained directly from the above preparations. These crystals were mounted on glass fibers and cooled at 193 K for data collection. The collected data were reduced by using the program CrystalClear (Rigaku and MSc, Ver. 1.3, 2001), and an absorption correction (multi-scan) was applied.<sup>[S2]</sup>

The crystal structures of **2**·3MeCN·2MeOH, **3**·10DMF·3H<sub>2</sub>O and **4**·MeOH were solved by direct methods and refined on  $F^2$  by full-matrix least-squares using anisotropic displacement parameters for all non-hydrogen atoms.<sup>S3</sup> All hydrogen atoms were placed in geometrically idealized positions (C–H = 0.98 Å for methyl groups; C–H = 0.95 Å for phenyl groups) and constrained to ride on their parent atoms with  $U_{\text{iso}}(\text{H}) = 1.2U_{\text{eq}}(\text{C})$  for phenyl groups and  $U_{\text{iso}}(\text{H}) = 1.5U_{\text{eq}}(\text{C})$  for methyl groups. Some important Relevant collection and refinement parameters for **2**·3MeCN·2MeOH, **3**·10DMF·3H<sub>2</sub>O and **4**·MeOH are summarized in Table S1. CCDC number of 1558989 for **2**·3MeCN·2MeOH, 1558990 for **3**·10DMF·3H<sub>2</sub>O, 1558991 for **4**·MeOH contain the supplementary crystallographic data for this paper. These data can be obtained free of charge from The Cambridge Crystallographic Data Center via [http://www.ccdc.cam.ac.uk/data\\_request/cif](http://www.ccdc.cam.ac.uk/data_request/cif).

**Table S1** Summary of crystallographic data and structure refinement parameters for **2**·3MeCN·2MeOH, **3**·10DMF·2H<sub>2</sub>O and **4**·MeOH

| Compound          | <b>2</b> ·3MeCN·2MeOH                                                                                                       | <b>3</b> ·10DMF·3H <sub>2</sub> O                                                                                                | <b>4</b> ·MeOH                                                                     |
|-------------------|-----------------------------------------------------------------------------------------------------------------------------|----------------------------------------------------------------------------------------------------------------------------------|------------------------------------------------------------------------------------|
| Molecular Formula | C <sub>56</sub> H <sub>77</sub> F <sub>12</sub> Hg <sub>2</sub> N <sub>9</sub> O <sub>6</sub> P <sub>2</sub> S <sub>4</sub> | C <sub>138</sub> H <sub>188</sub> Cd <sub>7</sub> Cl <sub>6</sub> Hg <sub>2</sub> N <sub>26</sub> O <sub>43</sub> S <sub>4</sub> | C <sub>19</sub> H <sub>30</sub> CdCl <sub>4</sub> HgN <sub>2</sub> OS <sub>2</sub> |
| Formula weight    | 1791.63                                                                                                                     | 4428.14                                                                                                                          | 821.37                                                                             |

| Crystal system                          | triclinic                          | triclinic                           | monoclinic                         |
|-----------------------------------------|------------------------------------|-------------------------------------|------------------------------------|
| Space group                             | $P\bar{1}$                         | $P\bar{1}$                          | $P2_1/c$                           |
| Size                                    | $0.50 \times 0.21 \times 0.12$     | $0.30 \times 0.18 \times 0.12$      | $0.40 \times 0.14 \times 0.12$     |
| $a$ (Å)                                 | 8.4455(17)                         | 16.080(2)                           | 12.542(3)                          |
| $b$ (Å)                                 | 10.670(2)                          | 16.7412(13)                         | 8.8863(18)                         |
| $c$ (Å)                                 | 19.8160(15)                        | 20.135(3)                           | 24.244(5)                          |
| $\alpha$ (°)                            | 93.09(2)                           | 101.243(2)                          | 90                                 |
| $\beta$ (°)                             | 99.53(3)                           | 108.605(3)                          | 93.86(3)                           |
| $\gamma$ (°)                            | 94.56(2)                           | 111.309(2)                          | 90                                 |
| $V$ (Å <sup>3</sup> )                   | 1751.4(5)                          | 4479.3(10)                          | 2695.9(10)                         |
| $Z$                                     | 1                                  | 1                                   | 4                                  |
| $T/K$                                   | 193(2)                             | 193(2)                              | 193(2)                             |
| $D_{\text{calc}}$ (g cm <sup>-3</sup> ) | 1.699                              | 1.642                               | 2.024                              |
| $\lambda$ (Mo-K $\alpha$ ) (Å)          | 0.71073                            | 0.71073                             | 0.71073                            |
| $\mu$ (cm <sup>-1</sup> )               | 46.27                              | 27.33                               | 70.43                              |
| $2\lambda_{\text{max}}$ (°)             | 50.7                               | 50.7                                | 50.7                               |
| Total reflections                       | 17096                              | 43855                               | 24838                              |
| Unique reflections                      | 6363 ( $R_{\text{int}} = 0.0314$ ) | 16267 ( $R_{\text{int}} = 0.0469$ ) | 4752 ( $R_{\text{int}} = 0.0601$ ) |
| No. observations                        | 5323 ( $I > 2.00 \sigma(I)$ )      | 12200 ( $I > 2.00 \sigma(I)$ )      | 4249 ( $I > 2.00 \sigma(I)$ )      |
| No. parameters                          | 430                                | 1043                                | 275                                |
| $R^a$                                   | 0.0338                             | 0.0513                              | 0.0427                             |
| $wR^b$                                  | 0.0711                             | 0.1161                              | 0.0811                             |
| GOF <sup>c</sup>                        | 1.034                              | 1.020                               | 1.193                              |

<sup>a</sup> $R = \sum ||F_o| - |F_c| / \sum |F_o|$ . <sup>b</sup> $wR = \{ \sum w(F_o^2 - F_c^2)^2 / \sum w(F_o^2)^2 \}^{1/2}$ . <sup>c</sup> GOF =  $\{ \sum [w(F_o^2 - F_c^2)^2] / (n-p) \}^{1/2}$ , where  $n$  = number of reflections and  $p$  = total numbers of parameters refined.

**Table S2** Selected bond distances (Å) and angles (°) for **2–4**

| Compound <b>2</b> |            |            |            |
|-------------------|------------|------------|------------|
| Hg(1)-S(1)        | 2.3702(13) | Hg(1)-S(2) | 2.3621(13) |

|                   |            |                   |            |
|-------------------|------------|-------------------|------------|
| Hg(1)-N(3)        | 2.480(4)   | S(1)-Hg(1)-S(2)   | 166.69(4)  |
| S(1)-Hg(1)-N(3)   | 103.66(10) | S(2)-Hg(1)-N(3)   | 89.28(10)  |
| <b>Compound 3</b> |            |                   |            |
| Hg(1)-S(1)        | 2.337(2)   | Hg(1)-S(2)        | 2.3399(19) |
| Hg(1)-Cl(1)       | 2.9113(15) | Cd(1)-N(4)        | 2.298(5)   |
| Cd(1)-N(8)#1      | 2.319(6)   | Cd(1)-O(7)        | 2.422(4)   |
| Cd(1)-O(1)        | 2.424(4)   | Cd(1)-O(8)        | 2.507(4)   |
| Cd(1)-O(2)        | 2.530(4)   | Cd(1)-Cl(1)       | 2.5905(15) |
| Cd(2)-N(6)#1      | 2.339(5)   | Cd(2)-N(3)        | 2.340(5)   |
| Cd(2)-O(6)        | 2.419(5)   | Cd(2)-O(9)#1      | 2.451(5)   |
| Cd(2)-O(10)#1     | 2.488(4)   | Cd(2)-Cl(2)       | 2.5509(16) |
| Cd(2)-O(5)        | 2.566(4)   | Cd(3)-N(7)        | 2.320(5)   |
| Cd(3)-N(5)        | 2.343(5)   | Cd(3)-O(4)        | 2.406(4)   |
| Cd(3)-O(3)        | 2.523(5)   | Cd(3)-O(11)       | 2.545(4)   |
| Cd(3)-O(12)       | 2.428(4)   | Cd(3)-Cl(3)       | 2.5160(15) |
| Cd(4)-O(2W)       | 2.224(4)   | Cd(4)-O(2W)#2     | 2.224(4)   |
| Cd(4)-O(1W)#2     | 2.200(4)   | Cd(4)-O(1W)       | 2.200(4)   |
| Cd(4)-O(3W)       | 2.283(4)   | Cd(4)-O(3W)#2     | 2.283(4)   |
| S(1)-Hg(1)-S(2)   | 173.37(6)  | S(1)-Hg(1)-Cl(1)  | 84.83(6)   |
| S(2)-Hg(1)-Cl(1)  | 101.64(5)  | O(8)-Cd(1)-O(2)   | 81.37(14)  |
| O(7)-Cd(1)-O(8)   | 53.59(13)  | O(1)-Cd(1)-O(8)   | 132.93(14) |
| N(4)-Cd(1)-O(2)   | 88.72(17)  | N(8)#1-Cd(1)-O(2) | 81.53(18)  |
| O(7)-Cd(1)-O(2)   | 134.98(14) | O(1)-Cd(1)-O(2)   | 52.26(14)  |
| N(4)-Cd(1)-O(1)   | 86.05(18)  | N(8)#1-Cd(1)-O(1) | 95.50(17)  |
| N(4)-Cd(1)-N(8)#1 | 166.2(2)   | N(8)#1-Cd(1)-O(7) | 91.97(18)  |

---

|                      |            |                      |            |
|----------------------|------------|----------------------|------------|
| N(4)-Cd(1)-O(7)      | 88.05(18)  | N(4)-Cd(1)-O(8)      | 85.15(17)  |
| N(4)-Cd(1)-Cl(1)     | 100.03(14) | N(8)#1-Cd(1)-Cl(1)   | 93.72(16)  |
| O(7)-Cd(1)-Cl(1)     | 89.86(11)  | O(1)-Cd(1)-Cl(1)     | 83.97(11)  |
| O(8)-Cd(1)-Cl(1)     | 143.10(10) | O(2)-Cd(1)-Cl(1)     | 134.82(11) |
| O(7)-Cd(1)-O(1)      | 170.59(15) | N(8)#1-Cd(1)-O(8)    | 83.81(17)  |
| O(6)-Cd(2)-Cl(2)     | 87.69(11)  | O(6)-Cd(2)-O(5)      | 52.95(14)  |
| N(6)#1-Cd(2)-Cl(2)   | 99.27(14)  | N(3)-Cd(2)-Cl(2)     | 96.82(13)  |
| N(6)#1-Cd(2)-O(9)#1  | 85.77(19)  | N(3)-Cd(2)-O(9)#1    | 85.47(17)  |
| N(6)#1-Cd(2)-N(3)    | 163.24(18) | N(3)-Cd(2)-O(6)      | 86.72(19)  |
| N(6)#1-Cd(2)-O(6)    | 89.2(2)    | N(6)#1-Cd(2)-O(10)#1 | 91.59(19)  |
| O(6)-Cd(2)-O(9)#1    | 134.39(16) | N(3)-Cd(2)-O(10)#1   | 94.24(18)  |
| O(6)-Cd(2)-O(10)#1   | 173.56(15) | O(9)#1-Cd(2)-Cl(2)   | 137.86(12) |
| O(9)#1-Cd(2)-O(10)#1 | 52.05(15)  | O(10)#1-Cd(2)-Cl(2)  | 85.87(11)  |
| N(6)#1-Cd(2)-O(5)    | 84.04(17)  | N(3)-Cd(2)-O(5)      | 80.54(16)  |
| O(9)#1-Cd(2)-O(5)    | 81.44(15)  | O(10)#1-Cd(2)-O(5)   | 133.49(14) |
| Cl(2)-Cd(2)-O(5)     | 140.58(10) | N(5)-Cd(3)-Cl(3)     | 98.97(12)  |
| N(7)-Cd(3)-N(5)      | 161.99(16) | N(7)-Cd(3)-O(4)      | 87.33(17)  |
| N(5)-Cd(3)-O(4)      | 86.11(17)  | N(7)-Cd(3)-O(12)     | 96.35(17)  |
| N(5)-Cd(3)-O(12)     | 91.88(16)  | N(7)-Cd(3)-Cl(3)     | 97.63(12)  |
| O(4)-Cd(3)-O(12)     | 173.51(15) | O(4)-Cd(3)-Cl(3)     | 88.70(12)  |
| O(4)-Cd(3)-O(3)      | 51.84(16)  | N(5)-Cd(3)-O(3)      | 82.71(16)  |
| N(7)-Cd(3)-O(3)      | 80.05(16)  | O(12)-Cd(3)-Cl(3)    | 85.51(11)  |
| O(12)-Cd(3)-O(11)    | 52.49(15)  | N(7)-Cd(3)-O(11)     | 83.53(17)  |
| Cl(3)-Cd(3)-O(11)    | 137.63(11) | N(5)-Cd(3)-O(11)     | 88.89(16)  |
| O(3)-Cd(3)-O(11)     | 81.69(16)  | O(4)-Cd(3)-O(11)     | 133.53(15) |
| Cl(3)-Cd(3)-O(3)     | 140.46(13) | O(12)-Cd(3)-O(3)     | 134.03(16) |

---

---

|                       |           |                       |           |
|-----------------------|-----------|-----------------------|-----------|
| O(3W)-Cd(4)-O(3W)#2   | 180.0     | O(2W)#2-Cd(4)-O(3W)#2 | 93.73(17) |
| O(2W)-Cd(4)-O(3W)#2   | 86.27(17) | O(1W)-Cd(4)-O(3W)#2   | 95.99(17) |
| O(1W)#2-Cd(4)-O(3W)#2 | 84.01(17) | O(2W)-Cd(4)-O(3W)     | 93.73(17) |
| O(2W)#2-Cd(4)-O(3W)   | 86.27(17) | O(1W)#2-Cd(4)-O(2W)   | 95.25(17) |
| O(1W)-Cd(4)-O(3W)     | 84.01(17) | O(1W)#2-Cd(4)-O(3W)   | 95.99(17) |
| O(1W)-Cd(4)-O(2W)#2   | 95.25(17) | O(2W)-Cd(4)-O(2W)#2   | 180.0     |
| O(1W)- Cd(4)-O(2W)    | 84.75(17) | O(1W)#2-Cd(4)-O(2W)#2 | 84.75(17) |
| O(1W)#2-Cd(4)-O(1W)   | 180.0     |                       |           |

**Compound 4**

|                   |            |                   |            |
|-------------------|------------|-------------------|------------|
| Hg(1)-S(1)        | 2.325(2)   | Hg(1)-S(2)        | 2.327(2)   |
| Cd(1)-Cl(1)       | 2.4426(19) | Cd(1)-Cl(2)       | 2.4644(19) |
| Cd(1)-Cl(3)       | 2.4644(19) | Cd(1)-Cl(4)       | 2.452(2)   |
| S(1)-Hg(1)-S(2)   | 171.58(6)  | Cl(1)-Cd(1)-Cl(2) | 110.97(7)  |
| Cl(1)-Cd(1)-Cl(3) | 114.15(6)  | Cl(1)-Cd(1)-Cl(4) | 105.49(7)  |
| Cl(2)-Cd(1)-Cl(3) | 105.37(7)  | Cl(2)-Cd(1)-Cl(4) | 106.11(8)  |
| Cl(3)-Cd(1)-Cl(4) | 114.54(8)  |                   |            |

---



**Table S3** The hydrogen bonding parameters (Å, °) between the coordinated water in  $[\text{Cd}(\text{H}_2\text{O})_6]^{2+}$  and carboxylate oxygen atom in **3**

| D-H...A                     | D-H  | H...A | D...A    | D-H...A |
|-----------------------------|------|-------|----------|---------|
| O1W-H1X...O5                | 0.96 | 2.04  | 2.717(6) | 126.0   |
| O1W-H1Y...O2                | 0.96 | 1.91  | 2.728(7) | 141.9   |
| O2W-H2X...O11               | 0.96 | 1.91  | 2.700(6) | 137.9   |
| O2W-H2Y...O8 <sup>i</sup>   | 0.96 | 1.81  | 2.754(6) | 165.7   |
| O3W-H3X...O9                | 0.96 | 1.87  | 2.793(6) | 159.3   |
| O3W-H3Y...O8                | 0.96 | 2.54  | 3.414(7) | 150.7   |
| O6W-H6X...O16               | 0.83 | 1.96  | 2.317(6) | 104.7   |
| O6W-H6Y...O16 <sup>ii</sup> | 0.83 | 1.99  | 2.317(6) | 102.4   |
| O6W-H6Y...N12 <sup>ii</sup> | 0.83 | 2.51  | 3.311(7) | 164.0   |

Symmetry codes: (i)  $2-x, 2-y, 2-z$ ; (ii)  $2-x, 2-y, 1-z$ .

## References

- S1 J. X. Chen, W. H. Zhang, X. Y. Tang, Z. G. Ren, Y. Zhang and J. P. Lang, *Inorg. Chem.*, 2006, **45**, 2568–2580.
- S2 G. M. Sheldrick, SADABS, Program for Empirical Absorption Correction of Area Detector Data; University of Göttingen, Germany **1996**.
- S3 G. Sheldrick, *Acta Crystallogr., Sect. C*, 2015, **71**, 3–8.
